# Supplementary material for: Newly incident cannabis use in the United States, 2002–2011: a regional and state level benchmark
Source: PeerJ. 2017 Jul 25;5:e3616. doi: 10.7717/peerj.3616 (PMC5530998; doi:10.7717/peerj.3616)
Supplement: Data S1 [file peerj-05-3616-s005.xlsx]

## Sheet: CanINC_Border Canada
R-DAS Raw Data								Stata metan random estimate					Stata Code
state	state_n	estimate	se	low95cb	up95cb	number		estimate	low95cb	up95cb	p-value
Vermont	50	8.81197	0.690509	7.53418	10.2824	6		6.245	5.843	6.648	0
Montana	30	8.20791	0.560379	7.162	9.39111	8
New Hampshire	33	7.23706	0.533292	6.24727	8.36966	10
Maine	23	7.15767	0.492509	6.23957	8.19905	10
Pennsylvania	42	6.36779	0.303053	5.79729	6.99026	94
New York	36	6.34147	0.230553	5.90299	6.81016	147
Wisconsin	55	6.33762	0.397624	5.59269	7.17424	42
Michigan	26	6.21192	0.221451	5.7905	6.66184	75
Ohio	39	5.88902	0.225285	5.46138	6.3479	81
Indiana	18	5.50972	0.398016	4.77096	6.35524	43
Illinois	17	5.4751	0.203999	5.08758	5.89032	87
Minnesota	27	5.44939	0.396789	4.71333	6.29281	34
North Dakota	38	5.19993	0.360918	4.52841	5.9648	5
Idaho	16	5.05812	0.459292	4.22042	6.05158	10

## Sheet: CanINC_Border NAtlantic
R-DAS Raw Data								Stata metan random estimate					Stata Code
state	state_n	estimate	se	low95cb	up95cb	number		estimate	low95cb	up95cb	p-value
Massachusetts	25	7.77153	0.46149	6.90351	8.73845	54		6.896	6.132	7.659	0.003
Rhode Island	44	7.51999	0.567792	6.46768	8.72754	8
Connecticut	9	7.44949	0.527873	6.46709	8.56745	29
Delaware	10	7.12001	0.570929	6.06671	8.33996	7
Maryland	24	6.0959	0.48257	5.2055	7.12715	41
New Jersey	34	5.59143	0.422821	4.80903	6.49244	57

## Sheet: CanINC_Border SAtlantic
R-DAS Raw Data								Stata metan fixed estimate					Stata Code
state	state_n	estimate	se	low95cb	up95cb	number		estimate	low95cb	up95cb	p-value
Virginia	51	5.69799	0.445978	4.87469	6.65063	51		5.229	4.797	5.66	0.278
North Carolina	37	5.46768	0.430961	4.67264	6.38892	57
Georgia	13	5.23049	0.420461	4.45609	6.13084	63
South Carolina	45	4.52776	0.437005	3.73529	5.4788	24

## Sheet: CanINC_Border Gulf of Mexico
R-DAS Raw Data								Stata metan random estimate					Stata Code
state	state_n	estimate	se	low95cb	up95cb	number		estimate	low95cb	up95cb	p-value
Florida	12	5.49937	0.230989	5.06248	5.97159	111		4.605	3.622	5.587	0
Louisiana	22	5.22375	0.420442	4.44946	6.12415	31
Alabama	1	4.28304	0.312602	3.70372	4.94832	26
Mississippi	28	3.39645	0.335263	2.79033	4.12865	14

## Sheet: CanINC_Border Mexico
R-DAS Raw Data								Stata metan random estimate					Stata Code
state	state_n	estimate	se	low95cb	up95cb	number		estimate	low95cb	up95cb	p-value
New Mexico	35	6.69653	0.535508	5.70871	7.84107	14		5.486	4.162	6.809	0
Arizona	4	5.46791	0.506219	4.5458	6.5642	40
Texas	48	4.50297	0.188702	4.14618	4.8889	143

## Sheet: CanINC_Border Pacific
R-DAS Raw Data								Stata metan random estimate					Stata Code
state	state_n	estimate	se	low95cb	up95cb	number		estimate	low95cb	up95cb	p-value
Oregon	41	7.26762	0.586037	6.18675	8.52017	29		6.513	5.293	7.734	0.046
California	6	5.99913	0.222547	5.57621	6.45192	283

## Sheet: Washington State
R-DAS Raw Data
state	state_n	estimate	se	low95cb	up95cb	number
Washington	53	5.94306	0.453906	5.1035	6.91068	43

## Sheet: Non-border
R-DAS Raw Data								Stata metan random estimate					Stata Code
state	state_n	estimate	se	low95cb	up95cb	number		estimate	low95cb	up95cb	p-value
Colorado	8	7.98249	0.484575	7.07202	8.99884	40		5.256	4.604	5.908	0
D.C.	11	7.17089	0.509074	6.22378	8.24944	4
Wyoming	56	6.22707	0.502435	5.30122	7.30216	4
South Dakota	46	6.03294	0.413464	5.2626	6.90782	6
Nevada	32	5.9622	0.500482	5.04289	7.03668	17
West Virginia	54	5.29425	0.456553	4.45786	6.27725	10
Missouri	29	5.29129	0.379525	4.58662	6.09729	37
Kansas	20	5.01847	0.516485	4.08696	6.14867	18
Kentucky	21	4.8773	0.340109	4.24484	5.59849	24
Iowa	19	4.86068	0.457647	4.0287	5.85398	19
Oklahoma	40	4.77824	0.397915	4.04758	5.63305	22
Nebraska	31	4.6644	0.381571	3.96285	5.48304	11
Arkansas	5	4.58978	0.403448	3.85224	5.4605	16
Tennessee	47	3.51283	0.347199	2.88514	4.27107	25
Utah	49	3.03967	0.299935	2.49757	3.69497	13

## Sheet: Alaska
R-DAS Raw Data
state	state_n	estimate	se	low95cb	up95cb	number
Alaska	2	5.85808	0.516144	4.9137	6.97065	5

## Sheet: Hawaii
R-DAS Raw Data
state	state_n	estimate	se	low95cb	up95cb	number
Hawaii	15	6.02833	0.576407	4.98077	7.27934	8

[truncated: 4 more sheets: Region comparison, Re-aggregated Mexico Border, Re-aggregated Pacific Border, Utah 'at risk' estimation]
